# Supplementary material for: Indol-3-Carbinol and Quercetin Ameliorate Chronic DSS-Induced Colitis in C57BL/6 Mice by AhR-Mediated Anti-Inflammatory Mechanisms
Source: PubMed Central journal article supplement (PMC7956562; doi:10.3390/ijerph18052262), 2021-02-25
Supplement: ijerph-18-02262-s001.pdf [file ijerph-18-02262-s001.pdf]

Supplementary Materials:

The following are available online at [www.mdpi.com/xxx/s1](http://www.mdpi.com/xxx/s1).

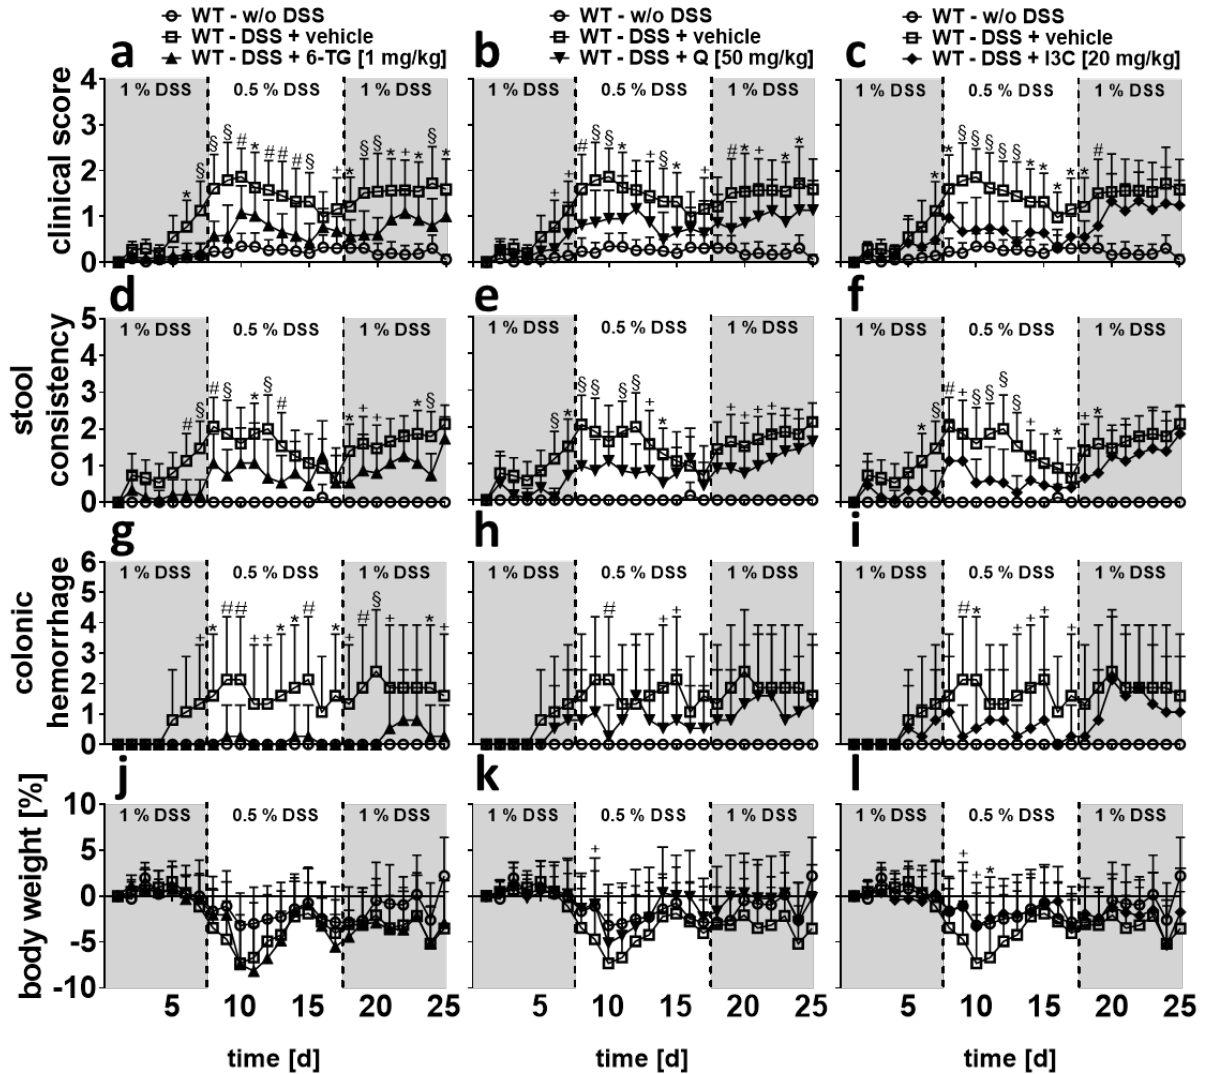

**Figure S1.** Therapeutic effects of Q and I3C during the course of chronic DSS colitis. Chronic colitis was induced in C57BL/6 wild-type (WT) mice by administering 1 % DSS in drinking water for 7 days, followed by 0.5 % DSS for 10 days, and again 1 % DSS for 7 days of. Animals were treated from days 1-10 and 18-22 with 6-thioguanine (6-TG; 1 mg/kg; **a, g, d, j**), quercetin (Q; 50 mg/kg; **b, e, h, k**) or indol-3-carbinol (I3C; 20 mg/kg; **c, f, i, l**) as indicated. Control animals were administered with PBS (1 % hydroxyethyl cellulose) by gavage (vehicle control). The clinical score (**a, b, c**) and its single parameters - stool consistency (**d, e, f**), colonic hemorrhage (**g, h, i**), and body weight loss (**j, k, l**) - were evaluated daily and are shown in the time course of the experiment as mean + SD. n=15 WT mice; +P < 0.05, \*P < 0.01, #P < 0.001 and §P < 0.0001 vs the vehicle control group.

**Table S1.** Scoring system for stool consistency and blood in stool.

| Scoring points | Stool consistency      | Blood in stool            |
|----------------|------------------------|---------------------------|
| 0              | normal                 | no visible blood in stool |
| 1              | soft, but still formed | -                         |
| 2              | very soft              | -                         |
| 3              | liquid                 | -                         |
| 4              | -                      | visible blood in stool    |

**Table S2.** Histological scoring system.

| Finding                                                    | Grade | Definition                                                          |
|------------------------------------------------------------|-------|---------------------------------------------------------------------|
| Fibrosis in submucosa                                      | 1     | Focal lesion                                                        |
|                                                            | 2     | Several focal lesions                                               |
|                                                            | 3     | Bridging lesion in the submucosa                                    |
|                                                            | 4     | Like Grade 3, but with enlargement of submucosa                     |
|                                                            | 5     | Enlargement causes doubling and more of originally submucosa height |
| Fibrosis in mucosa                                         | 1     | Focal lesion                                                        |
|                                                            | 2     | Several focal lesions                                               |
|                                                            | 3     | Up to 50 % replaced                                                 |
|                                                            | 4     | Almost 80 % replaced                                                |
|                                                            | 5     | Full replacement                                                    |
| Infiltration, granulocytes<br>(normal: max. 2-3/hpf (x20)) | 1     | 10/hpf <sup>1</sup>                                                 |
|                                                            | 2     | 20/hpf                                                              |
|                                                            | 3     | 50/hpf                                                              |
|                                                            | 4     | Large, multifocal infiltration                                      |
|                                                            | 5     | Infiltration forming compact masses of granulocytes                 |
| Infiltration, lymphocytes<br>(normal: max. 2-3/hpf (x20))  | 1     | 10/hpf                                                              |
|                                                            | 2     | 20/hpf                                                              |
|                                                            | 3     | 50/hpf                                                              |
|                                                            | 4     | Large, multifocal infiltration                                      |
|                                                            | 5     | Infiltration forming compact masses of lymphocytes                  |
| Infiltration, macrophages<br>(normal: max. 2-3/hpf (x20))  | 1     | 10/hpf                                                              |
|                                                            | 2     | 20/hpf                                                              |
|                                                            | 3     | 50/hpf                                                              |
|                                                            | 4     | Large, multifocal infiltration                                      |
|                                                            | 5     | Infiltration forming compact masses of macrophages                  |
| Edema                                                      | 1     | Very small lesions or focal only                                    |
|                                                            | 2     | Several foci, may be confluent                                      |
|                                                            | 3     | Extending normal thickness of mucosa                                |
|                                                            | 4     | Extending normal thickness of intestine                             |
|                                                            | 5     | Associated with disruption of original structures                   |
| Necrosis                                                   | 1     | Very small lesions on mucosal surface                               |
|                                                            | 2     | Several foci, may be confluent or one focus leading up to submucosa |
|                                                            | 3     | 20-30 % of mucosa involved                                          |
|                                                            | 4     | Up to 50 % of mucosa involved                                       |
|                                                            | 5     | Complete mucosa involved                                            |

<sup>1</sup> hpf: high power field
